# Supplementary material
Source: PubMed Central journal article supplement (PMC3030339)
Supplement: supp_M110.146761_Supplemental-revised.pdf [file supp_M110.146761_Supplemental-revised.pdf]

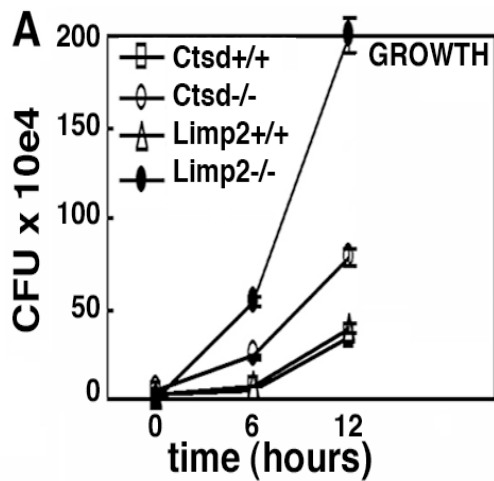

Figure S2

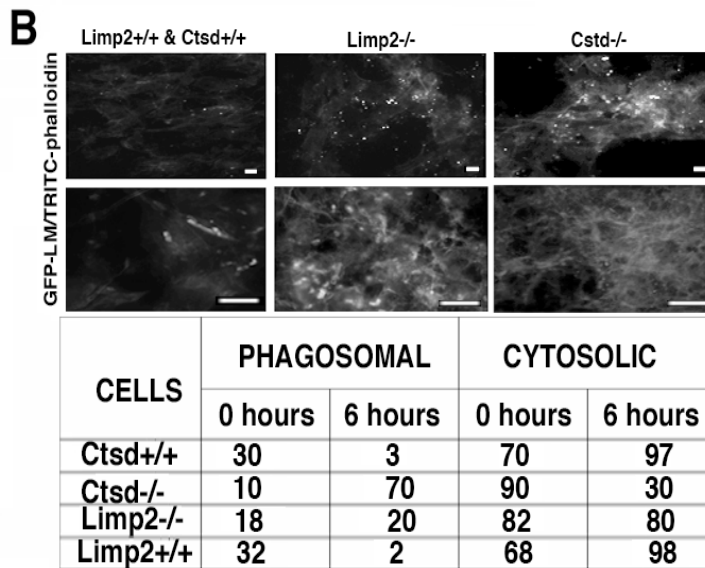

**Figure S2.- LIMP-2<sup>-/-</sup> mouse embryonic fibroblasts shows an enhanced LM cytosolic growth.** **A**, Mouse embryonic fibroblasts from genetic deficient mice: Ctsd<sup>-/-</sup>, Ctsd<sup>+/+</sup>, Limp-2<sup>-/-</sup> or Limp-2<sup>+/+</sup> were infected with LM for different times: 0, 6 or 12 hours. Results are expressed as CFU x 10<sup>4</sup> ± SD of triplicates. **B**, Different mouse embryonic fibroblasts were infected with GFP-LM (25:1 ratio bacteria: cell) for 6 h and cytoskeleton labelled with TRITC-phalloidin. Lower fluorescent images corresponded to GFP-LM co-localization with TRITC-phalloidin, analyzed by conventional fluorescent microscopy. Scale bars correspond with 5 μm. The table below corresponds to phagosomal and cytosolic fractions purified from PNS (30 μg) of Ctsd<sup>+/+</sup>, Ctsd<sup>-/-</sup>, Limp-2<sup>-/-</sup>, Limp-2<sup>+/+</sup> mouse embryonic fibroblasts infected for 0 or 6 h. Results are expressed as percentages of total CFU internalized in PNS as described in *Material and Methods*. CFU values for PNS at 0 h were: 6.5 ± 0.03 for Ctsd<sup>+/+</sup>, 32.5 ± 0.1 for Ctsd<sup>-/-</sup>, 63.7 ± 0.01 for Limp-2<sup>-/-</sup> and 7.0 ± 0.03 for Limp-2<sup>+/+</sup>.

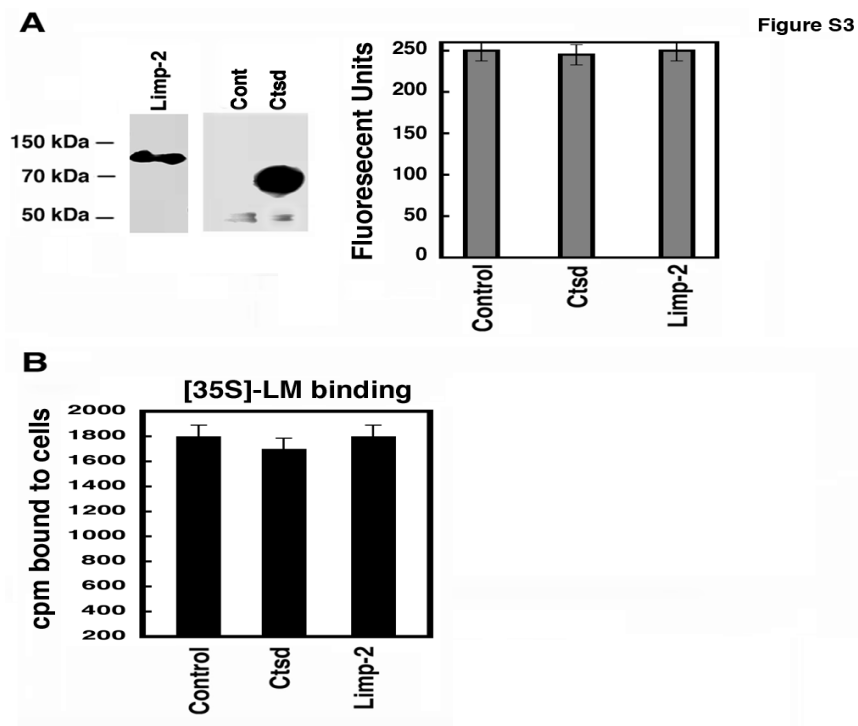

**Figure S3.- LIMP-2 transfectants display altered LM phagocytic rates but an enhanced ability to kill the pathogen.** \*Ctsd, LAMP-1 and LIMP-2 CHO transfectants. **A**, Protein and fluorescent levels of CHO transfectants (100,000 cells/lane or FACS analysis). Blots were developed with a rabbit anti-GFP antibody (for LAMP-1 and LIMP-2 transfectants) and rabbit anti-cathepsin-D (Ctsd). **B**, [<sup>35</sup>S-LM] (500,000 cpm/sample) were added to 4 x 10<sup>5</sup> CHO cells/well in polyvinyl 96-well plates in Materials and Methods on ice for 60 min for binding assays. Wells were cut off and radioactivity measured in a b-counter. Results are expressed as cpm bound to cells ± SD of triplicates. ~~C, LM infection kinetics at different times: 0,~~

| CELLS     | Phagocytic rate <sup>a</sup>             |                                            |
|-----------|------------------------------------------|--------------------------------------------|
|           | [ <sup>35</sup> S]-LM x 10 <sup>-2</sup> | [ <sup>35</sup> S]-HKLM x 10 <sup>-2</sup> |
| Control   | 55 ± 3                                   | 50 ± 2                                     |
| Limp-2    | 120 ± 6                                  | 110 ± 5                                    |
| AS        | 60 ± 3                                   | 64 ± 4                                     |
| AQ        | 63 ± 4                                   | 62 ± 3                                     |
| Limp-2/AS | 58 ± 2                                   | 55 ± 3                                     |
| Limp-2/AQ | 121 ± 6                                  | 122 ± 5                                    |

**Table S1.- Phagocytic rates of CHO cells and transfectants.** <sup>a</sup>Phagocytic rates of CHO cells, transfectants and co-transfectas (Control, Limp-2, AS, AQ, Limp-2/AS, Limp-2/AQ) were measured after 60 min of uptake of [<sup>35</sup>S]-LM or [<sup>35</sup>S]-HKLM (heat-killed LM) (500,000 cpm/well) as described in *Material and Methods*.
